# Supplementary material for: Preanalytical Pitfalls in Untargeted Plasma Nuclear Magnetic Resonance Metabolomics of Endocrine Hypertension
Source: MDPI journal article supplement (doi:10.3390/metabo12080679), 2022-07-24
Supplement: s1 [file s1]

## Article

# Preanalytical Pitfalls in Untargeted Plasma Nuclear Magnetic Resonance Metabolomics of Endocrine Hypertension

Nikolaos G. Bliziotis <sup>1,\*</sup>, Leo A. J. Kluijtmans <sup>1,\*</sup>, Gerjen H. Tinnevelt <sup>2</sup>, Parminder Reel <sup>3</sup>, Smarti Reel <sup>3</sup>, Katharina Langton <sup>4</sup>, Mercedes Robledo <sup>5</sup>, Christina Pamporaki <sup>4</sup>, Alessio Pecori <sup>6</sup>, Josie Van Kralingen <sup>7</sup>, Martina Tetti <sup>6</sup>, Udo F. H. Engelke <sup>1</sup>, Zoran Erlic <sup>8</sup>, Jasper Engel <sup>9</sup>, Timo Deutschbein <sup>10,11</sup>, Svenja Nölting <sup>12</sup>, Aleksander Prejbisz <sup>13</sup>, Susan Richter <sup>14</sup>, Jerzy Adamski <sup>15,16,17,18</sup>, Andrzej Januszewicz <sup>13</sup>, Filippo Ceccato <sup>19</sup>, Carla Scaroni <sup>19</sup>, Michael C. Dennedy <sup>20</sup>, Tracy A. Williams <sup>6</sup>, Livia Lenzini <sup>21</sup>, Anne-Paule Gimenez-Roqueplo <sup>22,23</sup>, Eleanor Davies <sup>7</sup>, Martin Fassnacht <sup>10,24,25</sup>, Hanna Remde <sup>10</sup>, Graeme Eisenhofer <sup>4,14</sup>, Felix Beuschlein <sup>8,12</sup>, Matthias Kroiss <sup>10,12,24,25</sup>, Emily Jefferson <sup>3,26</sup>, Maria-Christina Zennaro <sup>22,23</sup>, Ron A. Wevers <sup>1,\*</sup>, Jeroen J. Jansen <sup>2</sup>, Jaap Deinum <sup>27</sup> and Henri J. L. M. Timmers <sup>27,\*</sup>

<sup>1</sup> Department of Laboratory Medicine, Translational Metabolic Laboratory, Radboud University Medical Center, 6525 GA Nijmegen, The Netherlands; udo.engelke@radboudumc.nl

<sup>2</sup> Department of Analytical Chemistry, Institute for Molecules and Materials, Radboud University, 6500 HB Nijmegen, The Netherlands; g.tinnevelt@science.ru.nl (G.H.T.); jeroen.jansen@ru.nl (J.J.J.)

<sup>3</sup> Division of Population Health and Genomics, School of Medicine, University of Dundee, Dundee DD2 4BF, UK; p.s.reel@dundee.ac.uk (P.R.); s.reel@dundee.ac.uk (S.R.); e.r.jefferson@dundee.ac.uk (E.J.)

<sup>4</sup> Department of Medicine III, University Hospital Carl Gustav Carus, Technische Universität Dresden, 01307 Dresden, Germany; katharina.langton@uniklinikum-dresden.de (K.L.); christina.pamporaki@uniklinikum-dresden.de (C.P.); graeme.eisenhofer@uniklinikum-dresden.de (G.E.)

<sup>5</sup> Hereditary Endocrine Cancer Group, Spanish National Cancer Research Centre (CNIO), and Centro de Investigación Biomédica en Red de Enfermedades Raras (CIBERER), 28029 Madrid, Spain; mrobledo@cnio.es

<sup>6</sup> Division of Internal Medicine and Hypertension Unit, Department of Medical Sciences, University of Torino, 10124 Torino, Italy; alessio.pecori@edu.unito.it (A.P.); tetti.martina@gmail.com (M.T.); tracyannwilliams48@gmail.com (T.A.W.)

<sup>7</sup> British Heart Foundation Glasgow Cardiovascular Research Centre (BHF GCRC), Institute of Cardiovascular & Medical Sciences (ICAMS), University of Glasgow, Glasgow G12 8TA, UK; josievankralingen@googlemail.com (J.V.K.); eleanor.davies@glasgow.ac.uk (E.D.)

<sup>8</sup> Department of Endocrinology, Diabetology and Clinical Nutrition, University Hospital Zurich (USZ) and University of Zurich (UZH), 8091 Zurich, Switzerland; zoran.erlic@usz.ch (Z.E.); felix.beuschlein@usz.ch (F.B.)

<sup>9</sup> Biometris, Wageningen University & Research, 6708 PB Wageningen, The Netherlands; jasper.engel@wur.nl

<sup>10</sup> Department of Internal Medicine I, Division of Endocrinology and Diabetes, University Hospital, University of Würzburg, 97080 Würzburg, Germany; deutschbein\_t@ukw.de (T.D.); fassnacht\_m@ukw.de (M.F.); remde\_h@ukw.de (H.R.); kroiss\_m@ukw.de (M.K.)

<sup>11</sup> Medicover Oldenburg MVZ, 26122 Oldenburg, Germany

<sup>12</sup> Department of Medicine IV, University Hospital, LMU Munich, 80336 Munich, Germany; svenja.noelting@med.uni-muenchen.de

<sup>13</sup> Department of Hypertension, Institute of Cardiology, 04-628 Warsaw, Poland; prejbisz@vp.pl (A.P.); ajanu@op.pl (A.J.)

<sup>14</sup> Institute of Clinical Chemistry and Laboratory Medicine, University Hospital Carl Gustav Carus at the Technische Universität Dresden, 01307 Dresden, Germany; susan.richter@uniklinikum-dresden.de

<sup>15</sup> Research Unit Molecular Endocrinology and Metabolism, Genome Analysis Center, Helmholtz Center München, German Research Center for Environmental Health, D-85764 Neuherberg, Germany; adamski@helmholtz-muenchen.de

<sup>16</sup> Institute of Biochemistry, Faculty of Medicine, University of Ljubljana, 1000 Ljubljana, Slovenia

<sup>17</sup> Institute of Experimental Genetics, Technical University München, 85350 Freising—Weihenstephan, Germany

<sup>18</sup> Department of Biochemistry, Yong Loo Lin School of Medicine, National University of Singapore, Singapore 119077, Singapore

<sup>19</sup> Endocrinology Unit, Department of Medicine DIMED, University-Hospital of Padova, 35128 Padova, Italy; ceccato.filippo@gmail.com (F.C.); carla.scaroni@unipd.it (C.S.)

<sup>20</sup> The Discipline of Pharmacology and Therapeutics, School of Medicine, National University of Ireland, H91 CF50 Galway, Ireland; conall.dennedy@mailn.hse.ie

**Citation:** Bliziotis, N.G.; Kluijtmans, L.A.J.; Tinnevelt, G.H.; Reel, P.; Reel, S.; Langton, K.; Robledo, M.; Pamporaki, C.; Pecori, A.; Van Kralingen, J.; et al. Preanalytical Pitfalls in Untargeted Plasma Nuclear Magnetic Resonance Metabolomics of Endocrine Hypertension. *Metabolites* **2022**, *12*, 679. <https://doi.org/10.3390/metabo12080679>

Academic Editor: Martin Grootveld

Received: 30 May 2022

Accepted: 11 July 2022

Published: 24 July 2022

**Publisher's Note:** MDPI stays neutral with regard to jurisdictional claims in published maps and institutional affiliations.

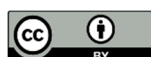

**Copyright:** © 2022 by the authors. Licensee MDPI, Basel, Switzerland. This article is an open access article distributed under the terms and conditions of the Creative Commons Attribution (CC BY) license (<https://creativecommons.org/licenses/by/4.0/>).

<sup>21</sup> Department of Medicine-DIMED, Emergency and Hypertension Unit, University of Padova, University Hospital, 35126 Padova, Italy; livia.lenzini@gmail.com

<sup>22</sup> INSERM, PARCC, Université de Paris, 75015 Paris, France; anne-paule.gimenez-roqueplo@aphp.fr (A.-P.G.-R.); maria-christina.zennaro@inserm.fr (M.-C.Z.)

<sup>23</sup> Service de Génétique, Assistance Publique-Hôpitaux de Paris, Hôpital Européen Georges Pompidou, 75015 Paris, France

<sup>24</sup> Core Unit Clinical Mass Spectrometry, University Hospital Würzburg, 97080 Würzburg, Germany

<sup>25</sup> Comprehensive Cancer Center Mainfranken, Würzburg University, 97070 Würzburg, Germany

<sup>26</sup> Institute of Health & Wellbeing, Glasgow University, G12 8RZ Glasgow, UK

<sup>27</sup> Department of Internal Medicine, Radboud University Medical Center, 6525 GA Nijmegen, The Netherlands; jaap.deinum@radboudumc.nl (J.D.)

\* Correspondence: nick.bliziotis@radboudumc.nl (N.G.B.); leo.kluijtmans@radboudumc.nl (L.A.J.K.); ron.wevers@radboudumc.nl (R.A.W.); henri.timmers@radboudumc.nl (H.J.L.M.T.)

## Supplementary Material

### Results

PCA of the metabolomics data for all patients, along with HV (n=76) and QC (n=108) samples is shown in Figure S1, with each sample analyzed having a unique metabolic signature that results in a single point in the plot. In total, there was 1 patient with Adrenocortical Carcinoma (ACC), 33 patients with Cushing's Syndrome (CS), 104 patients with Primary Aldosteronism (PA), 106 patients with Primary Hypertension (PHT) and 94 patients with Pheochromocytoma or Paraganglioma (PPGL). According to the plot, in Figure S1, which explains 48% of the dataset's variation, QC samples cluster together closer than samples from any of the other groups, and indicate the amount of analytical variation in the dataset. The coefficients of variation of the final set of 86 peaks in QC samples (which describe technical variation) were multiplied by two to be comparable to those of HVs, PHT, and EHT samples (which describe technical + biological variation) and were found to be lower in QCs than in any of the other groups of samples, with a paired t-test yielding significant results for the comparison of PHT peak CVs ( $p=1.343e-05$ ), as well as EHT ( $p=0.004$ ) and the combination of PHT+EHT ( $p=0.003$ ), but not for HVs ( $p=0.121$ ). The median coefficient of variation in QC samples was found to be 0.098 in the final dataset, with a median absolute deviation of 0.076. HV samples could be separated based on the batch in which they were analyzed, and QC samples based on their run order within batches. The influence of both these

analytical factors, as well as that of biological factors patient age and sex were not found to be strong influences on data distribution (Figure S2), in contrast to sample center of origin and sample age (Figure 1).

**Table S1:** Detectable metabolites, based on their corresponding peaks, PubMed CID, level of identification rigor (according to MSI guidelines(Sumner et al., 2007)) and metabolites that also correspond to at least one peak. L2\* identification rigor resulted from visual inspection along with 2D NMR and experiments on filtered plasma at pH 2.5.

| Metabolite       | Peaks (ppm)                                                     | CID     | Level of Identification rigor | Overlaps with           |
|------------------|-----------------------------------------------------------------|---------|-------------------------------|-------------------------|
| Acetylcarnitine  | 3.177                                                           | 7045767 | 1                             |                         |
| Alanine          | 1.457, 1.472                                                    | 5950    | 1                             |                         |
| Creatine         | 3.021, 3.917                                                    | 586     | 1                             | Lysine                  |
| Creatinine       | 3.028, 4.041                                                    | 588     | 1                             | Ornithine               |
| Dimethyl sulfone | 3.137                                                           | 6213    | 2                             |                         |
| Dimethylamine    | 2.695                                                           | 674     | 2                             |                         |
| Dimethylglycine  | 2.91                                                            | 673     | 2                             |                         |
| Formate          | 8.441                                                           | 284     | 2                             |                         |
| Glucose          | 5.22, 5.227                                                     | 5793    | 2*                            |                         |
| Glutamate        | 2.047, 2.06, 2.075, 2.095, 2.108,<br>2.122, 2.145, 2.325, 2.356 | 33032   | 2*                            | Proline,<br>Methionine, |

|            |                                                          |      |    |                                       |
|------------|----------------------------------------------------------|------|----|---------------------------------------|
|            |                                                          |      |    | Glutamine,<br>Pyruvate                |
| Glutamine  | 2.095, 2.108, 2.122, 2.145, 2.418,<br>2.428, 2.433, 2.46 | 5961 | 2* | Glutamate,<br>Methionine,<br>Proline  |
| Glycerol   | 3.555, 3.567                                             | 753  | 2* | Threonine,<br>Glycine                 |
| Glycine    | 3.548                                                    | 750  | 1  | Glycerol                              |
| Histidine  | 3.126, 3.963, 3.973, 3.985                               | 6274 | 1  | Serine,<br>Phenylalanine              |
| Isoleucine | 0.907, 0.922, 0.933, 0.987, 1.001                        | 6306 | 2* | Leucine                               |
| Lactate    | 1.307, 1.321, 4.08, 4.094, 4.108,<br>4.121               | 612  | 2* | Proline, 3-<br>hydroxybutyrate        |
| Leucine    | 0.933, 0.945, 0.957, 1.71                                | 6106 | 2* | Isoleucine, Lysine,<br>Ornithine      |
| Lysine     | 1.71, 1.873, 1.894, 2.997, 3.013,<br>3.021               | 5962 | 1  | Creatine,<br>Isoleucine,<br>Ornithine |
| Methanol   | 3.346                                                    | 887  | 1  | Proline                               |
| Methionine | 2.122                                                    | 6137 | 1  | Glutamate,<br>Glutamine               |

|                        |                                                                                                      |        |    |                                          |
|------------------------|------------------------------------------------------------------------------------------------------|--------|----|------------------------------------------|
| Ornithine              | 1.71, 1.873, 1.894, 3.028, 3.041,<br>3.057                                                           | 6262   | 2* | Creatinine, Lysine,<br>Leucine           |
| Phenylalanine          | 3.126, 3.963, 3.973, 3.985                                                                           | 6140   | 1  | Histidine, Serine                        |
| Proline                | 1.968, 1.982, 1.996, 2.01, 2.047, 2.06,<br>2.075, 2.095, 2.325, 3.298, 3.312,<br>3.321, 3.335, 3.346 | 145742 | 2* | Glutamate,<br>Lactate, Methanol          |
| Pyruvate               | 2.356                                                                                                | 1060   | 1  | Glutamate                                |
| Serine                 | 3.939, 3.951, 3.963, 3.973, 3.985                                                                    | 5951   | 1  | Histidine,<br>Phenylalanine,<br>Tyrosine |
| Threonine              | 3.567, 3.576, 4.227, 4.24, 4.252                                                                     | 6288   | 1  | Glycerol                                 |
| Tyrosine               | 3.939, 6.874, 6.892, 7.168, 7.185                                                                    | 6057   | 1  | Serine                                   |
| Valine                 | 0.967, 0.981, 1.019, 1.033, 2.239,<br>2.248, 2.253, 3.594, 3.603                                     | 6287   | 2* |                                          |
| Unknown<br>metabolites | 3.162, 3.262, 3.284, 3.612, 3.67                                                                     |        | 4  |                                          |

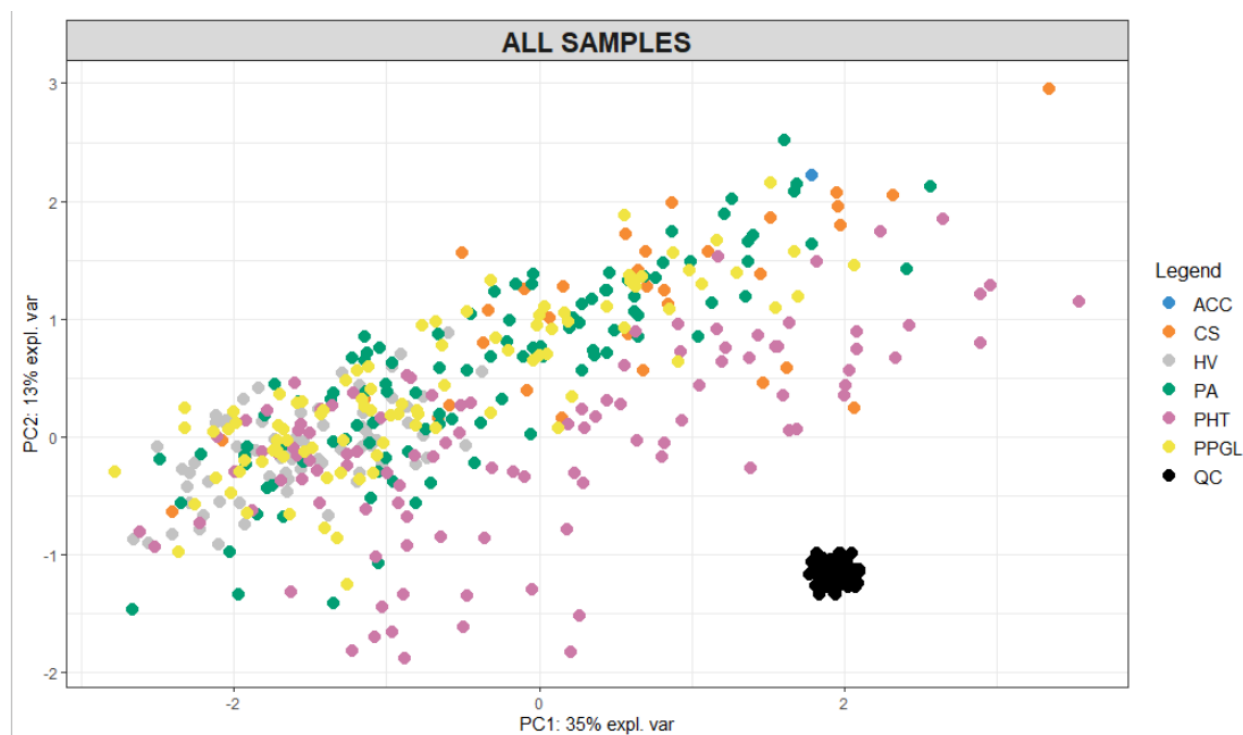

**Figure S1:** PCA score plot of the complete dataset. This plot includes Healthy Volunteers (HV), Quality Controls (QC), as well as samples collected from all disease groups (PA, PHT, PPGL and CS). One patient was found to have adrenocortical carcinoma (ACC) and was left out of subsequent analyses. Principal components 1 and 2 were used for the plot. QC samples were technical replicates and were aliquoted from pooled plasma collected from patients not included in the present study. The spread of QC samples is indicative of technical variation associated to the data, which is significantly lower than biological.

**Table S2:** Summary of accuracies from analyses done via the Initial Approach, without correcting for confounders.

| Scenario | Analysis | Balanced Accuracy | Sensitivity** | Specificity** |  |
|----------|----------|-------------------|---------------|---------------|--|
|          |          |                   |               | *             |  |
| EHT-PHT  | sPLSDA   | 79[78-79]         | 87[87-87]     | 70[70-71]     |  |
|          | glmnet   | 77[77-78]         | 95[95-96]     | 59[59-60]     |  |

|          |                                          |           |           |           |  |
|----------|------------------------------------------|-----------|-----------|-----------|--|
|          | Including<br>patient age,<br>sex, sPLSDA | 79[79-80] | 88[88-88] | 71[70-71] |  |
|          | Including<br>patient age,<br>sex, glmnet | 76[76-77] | 96[96-96] | 57[56-57] |  |
| PA-PHT   | sPLSDA                                   | 83[83-84] | 90[89-90] | 77[77-78] |  |
|          | glmnet                                   | 83[82-83] | 86[86-87] | 79[79-80] |  |
|          | Including<br>patient age,<br>sex, sPLSDA | 83[83-84] | 90[90-91] | 76[76-77] |  |
|          | Including<br>patient age,<br>sex, glmnet | 84[83-84] | 88[88-89] | 79[79-79] |  |
| PPGL-PHT | sPLSDA                                   | 79[78-79] | 88[87-88] | 70[69-70] |  |
|          | glmnet                                   | 78[78-79] | 77[76-78] | 79[78-80] |  |
|          | Including<br>patient age,<br>sex, sPLSDA | 78[77-78] | 84[83-84] | 72[71-72] |  |

|         |                                          |                      |            |             |                 |                  |
|---------|------------------------------------------|----------------------|------------|-------------|-----------------|------------------|
|         | Including<br>patient age,<br>sex, glmnet | 77[77-78]            | 77[76-78]  | 78[77-79]   |                 |                  |
| CS-PHT  | sPLSDA                                   | 85[84-85]            | 71[71-72]  | 98[98-99]\$ |                 |                  |
|         | glmnet                                   | 84[83-84]            | 69[68-70]  | 98[98-99]\$ |                 |                  |
|         | Including<br>patient age,<br>sex, sPLSDA | 85[84-85]            | 73[72-74]  | 97[96-97]   |                 |                  |
|         | Including<br>patient age,<br>sex, glmnet | 83[82-83]            | 67[66-68]  | 98[98-98]\$ |                 |                  |
|         |                                          | Balanced<br>Accuracy | CS TP Rate | PA TP* Rate | PHT TP*<br>Rate | PPGL TP*<br>Rate |
| ALL-ALL | sPLSDA                                   | 65[64-65]            | 73[72-74]  | 65[64-65]   | 72[72-72]       | 50[49-51]        |
|         | glmnet                                   | 63[62-63]            | 49[48-50]  | 69[68-70]   | 73[73-74]       | 60[59-61]        |
|         | Including<br>patient age,<br>sex, sPLSDA | 66[66-67]            | 76[75-77]  | 64[63-65]   | 69[68-69]       | 57[56-58]        |
|         | Including<br>patient age,<br>sex, glmnet | 63[62-63]            | 48[47-49]  | 70[69-71]   | 72[72-73]       | 61[60-62]        |



\*TP stands for True Positive

\*\*Sensitivity is the TP rate of the disease group (EHT, PA, PPGL or CS)

\*\*\*Specificity is the TP rate of the control group (PHT).

All metrics are given as means, with the 95% confidence interval (in brackets). The marked populations of CS-PHT model estimates

(\$ ) were not normal (values close to 100).

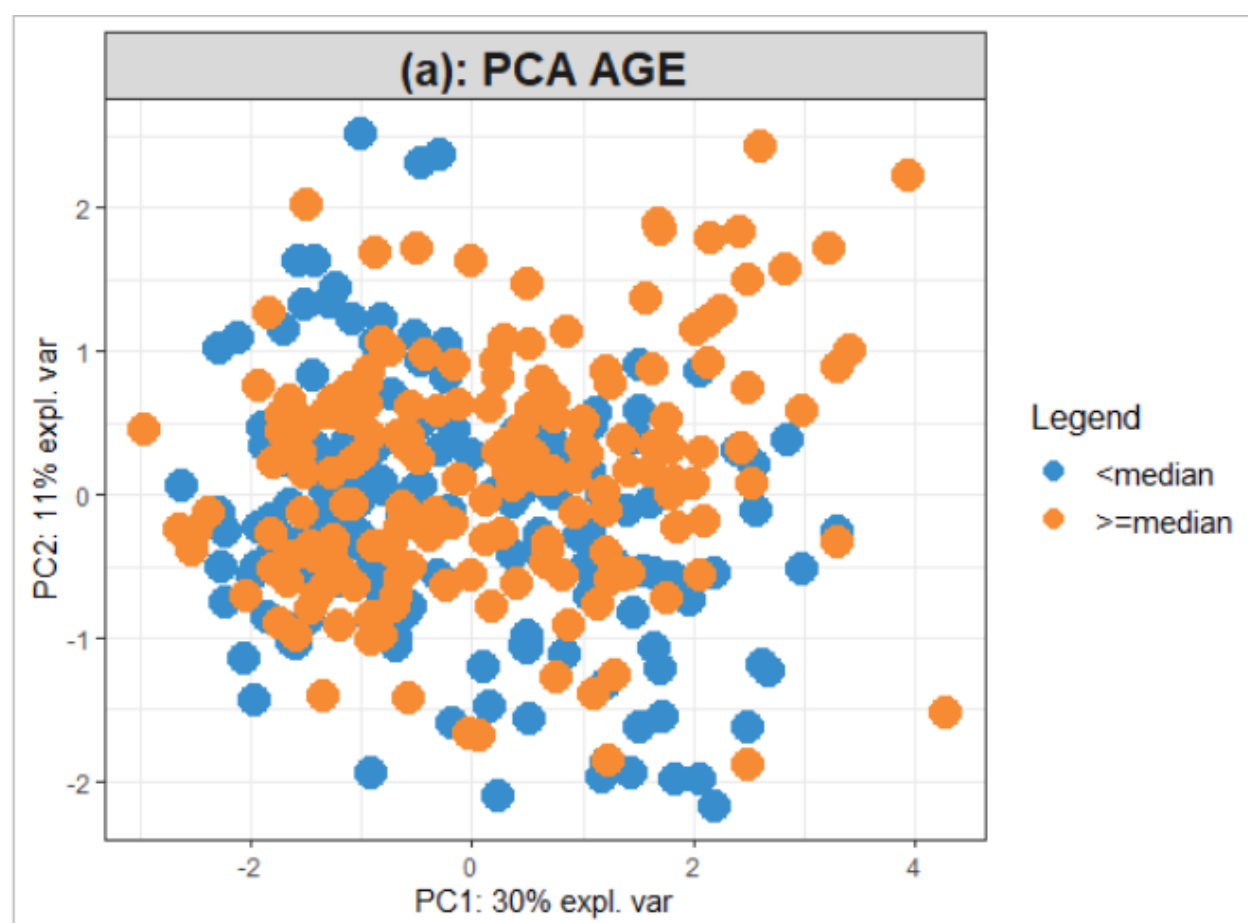

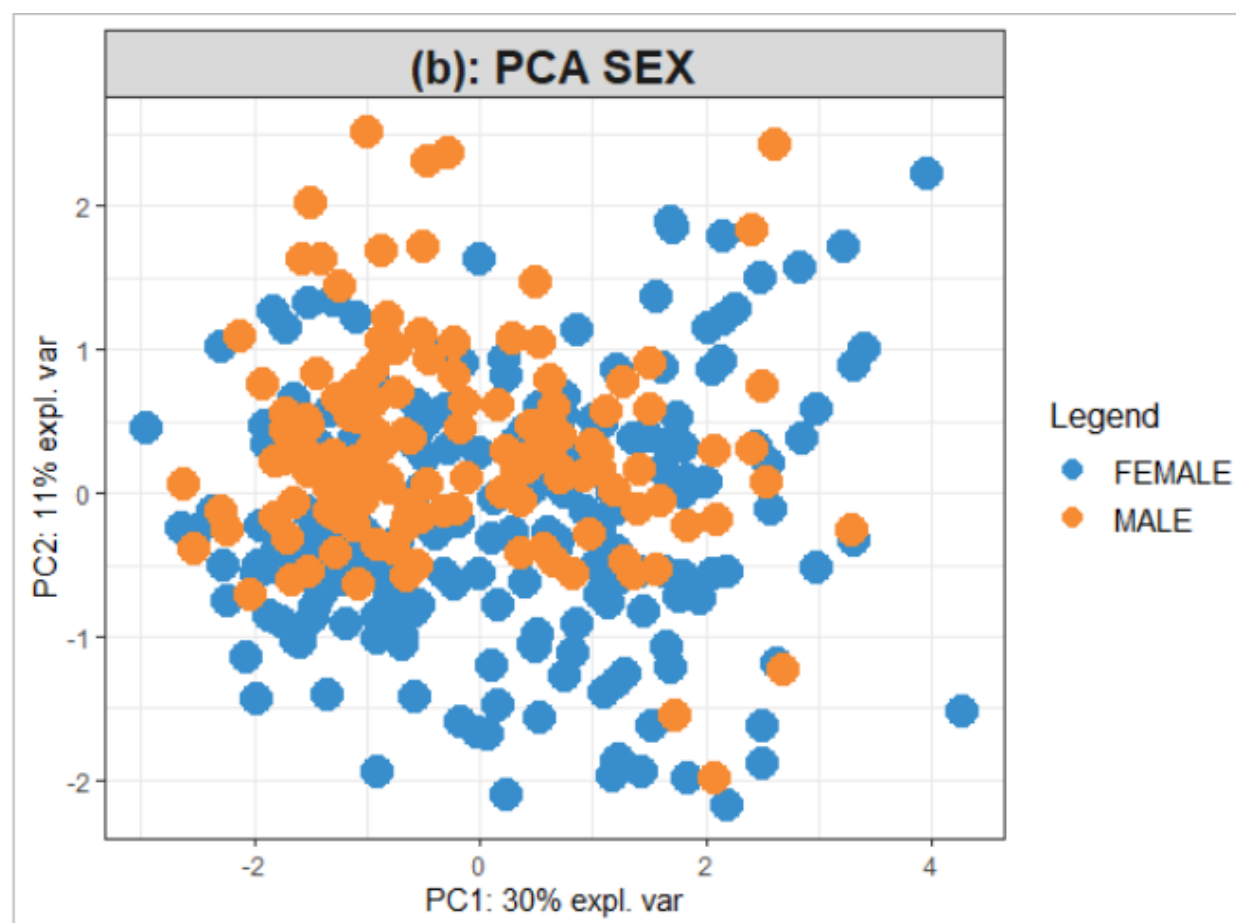

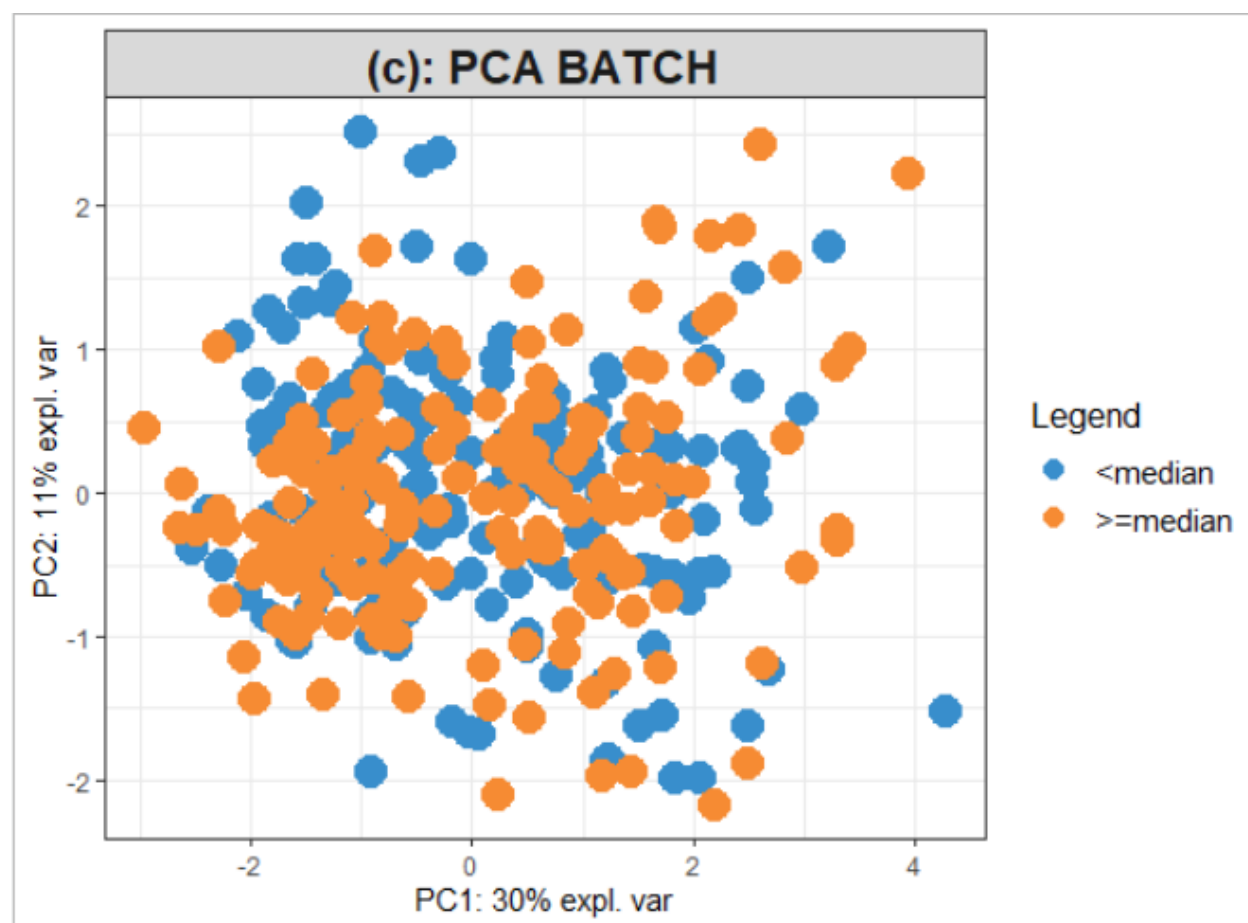

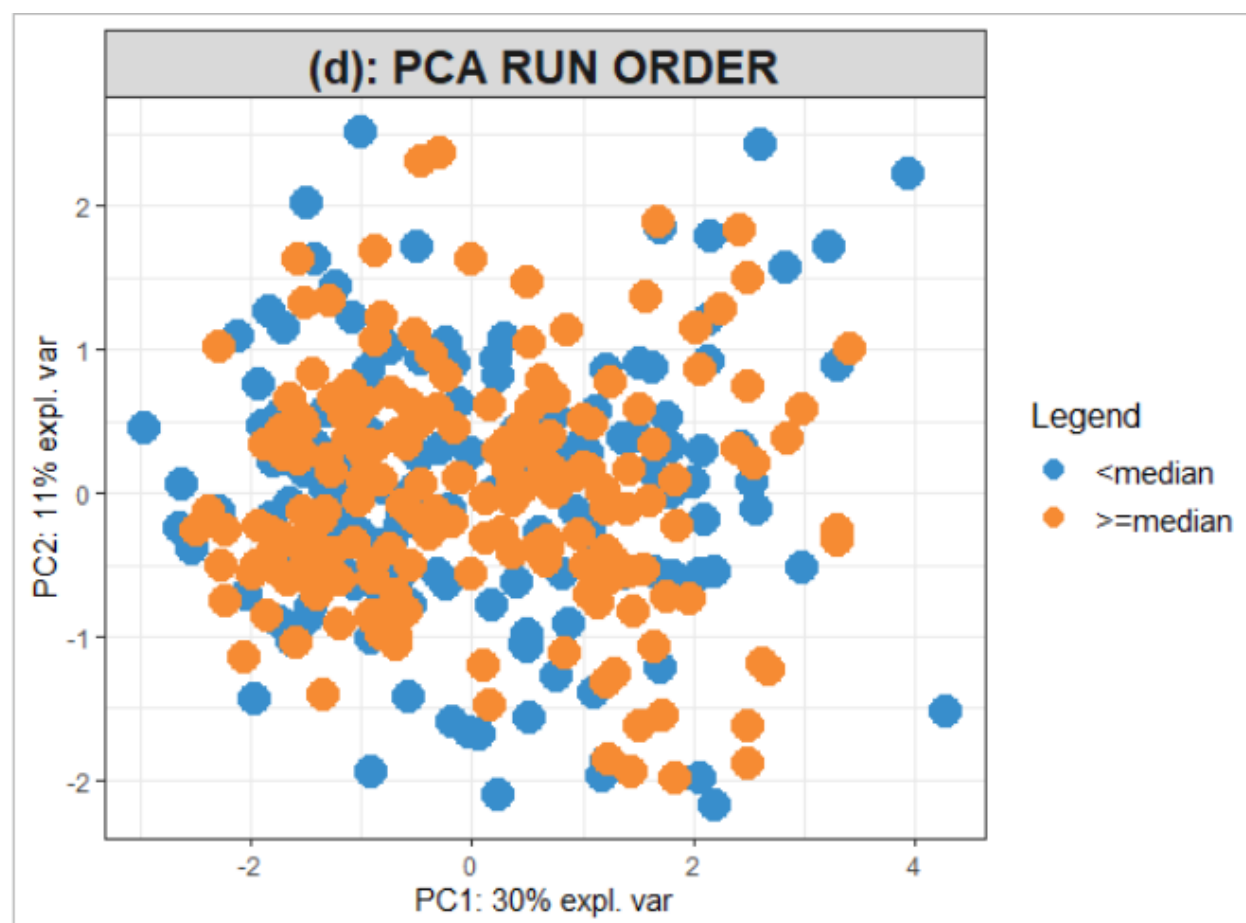

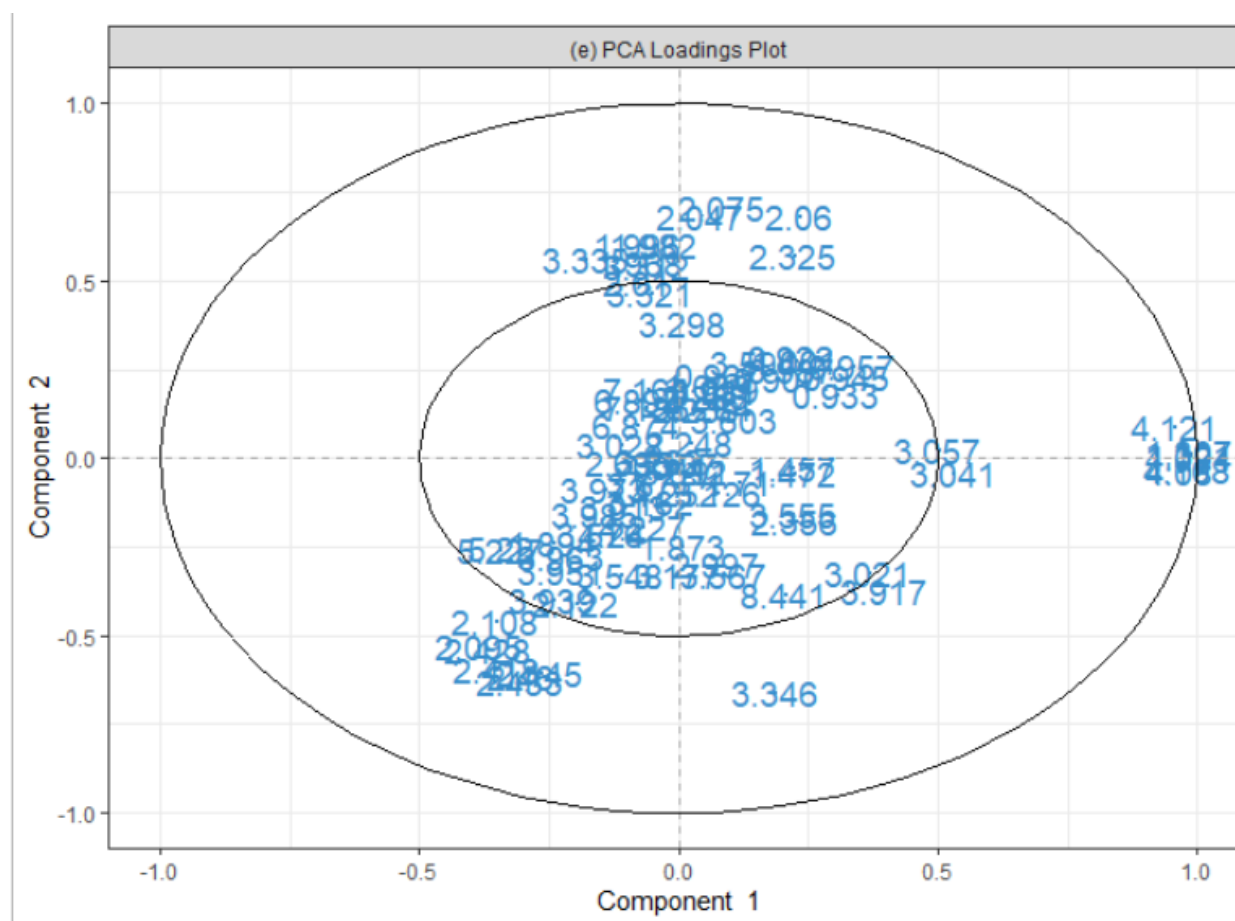

**Figure S2:** PCA score plots of the dataset that included all disease groups. Samples colored by (a) patient age, (b) patient sex, (c) analytical batch, (d) run order within batches. For continuous variables patient age, analytical batch and run order, groups were defined by the corresponding medians. Figure (e) is the loadings plot of the PCA score plot depicted in Figure 1. The clusters of samples can be explained by outstanding metabolites lactate (peaks at 1.3 and 4 ppm), methanol (3.346 ppm), glutamine (peaks at 2.1 and 2.4 ppm) and glutamate (peaks at 2.325 and 2.05 ppm).

**Table S3:** Summary of accuracies from analyses done via Approach A (ASCA correction).

| Scenario | Analysis | Balanced Accuracy | Sensitivity* | Specificity** |
|----------|----------|-------------------|--------------|---------------|
| EHT-PHT  | sPLSDA   | 79[79-79]         | 84[83-84]    | 74[73-74]     |

|          |        |           |           |           |
|----------|--------|-----------|-----------|-----------|
|          | glmnet | 77[77-78] | 95[95-95] | 60[60-60] |
| PA-PHT   | sPLSDA | 83[83-83] | 89[89-90] | 77[77-77] |
|          | glmnet | 83[83-84] | 88[88-89] | 78[78-79] |
| PPGL-PHT | sPLSDA | 81[80-81] | 86[85-87] | 75[75-76] |
|          | glmnet | 80[80-81] | 82[82-83] | 78[77-78] |

\*Sensitivity is the true positive rate of the disease group (EHT, PA or PPGL)

\*\*Specificity is the true positive rate of the control group (PHT).

All metrics are given as means, with the 95% confidence interval (in brackets).

**Table S4:** Summary of PLSDA analyses done to compare groups of samples defined by confounders.

| PLSDA                    | B. ACCURACY | Group 1 TP Rate | Group 2 TP Rate |
|--------------------------|-------------|-----------------|-----------------|
| PA-PHT                   |             |                 |                 |
| Cluster 1 vs. Cluster 2* | 92[92-93]   | 89[89-90]       | 95[95-95]       |
| Sample Age**             | 88[87-88]   | 90[89-90]       | 86[85-86]       |
| PPGL-PHT                 |             |                 |                 |
| Cluster 1 vs. Cluster 2* | 93[93-93]   | 92[92-93]       | 94[93-94]       |
| Sample Age**             | 80[80-80]   | 84[83-85]       | 76[75-77]       |

\* Samples compared based on PCA cluster (Figure 1).

\*\* Samples compared based on sample age, with the median value as the cutoff for the two groups.

All metrics are given as means, with the 95% confidence interval (in brackets).

**Table S5:** Summary of accuracies from analyses done via Approach B (after the exclusion of peaks related to confounders).

| Scenario | Analysis                                 | Balanced<br>Accuracy | Sensitivity** | Specificity*<br>** |  |
|----------|------------------------------------------|----------------------|---------------|--------------------|--|
| EHT-PHT  | sPLSDA                                   | 67[66-67]            | 69[69-70]     | 64[63-65]          |  |
|          | glmnet                                   | 64[63-64]            | 87[86-87]     | 41[39-42]          |  |
|          | Including<br>patient age, sex,<br>sPLSDA | 68[67-68]            | 70[69-70]     | 66[65-66]          |  |
|          | Including<br>patient age, sex,<br>glmnet | 64[64-65]            | 88[87-88]     | 41[40-42]          |  |
| PA-PHT   | sPLSDA                                   | 69[69-70]            | 70[69-71]     | 69[68-70]          |  |
|          | glmnet                                   | 70[69-70]            | 71[70-71]     | 68[68-69]          |  |
|          | Including<br>patient age, sex,<br>sPLSDA | 69[69-70]            | 71[70-71]     | 68[67-69]          |  |
|          | Including<br>patient age, sex,<br>glmnet | 69[69-70]            | 70[69-71]     | 68[68-69]          |  |
| PPGL-PHT | sPLSDA                                   | 68[68-69]            | 69[68-70]     | 67[66-68]          |  |
|          | glmnet                                   | 68[68-69]            | 65[64-65]     | 72[71-73]          |  |

|         |                                          |                      |            |             |                 |                  |
|---------|------------------------------------------|----------------------|------------|-------------|-----------------|------------------|
|         | Including<br>patient age, sex,<br>sPLSDA | 69[69-70]            | 70[69-71]  | 69[68-70]   |                 |                  |
|         | Including<br>patient age, sex,<br>glmnet | 69[68-69]            | 65[64-65]  | 73[72-73]   |                 |                  |
| CS-PHT  | sPLSDA                                   | 82[81-82]            | 79[78-80]  | 84[84-85]   |                 |                  |
|         | glmnet                                   | 75[74-75]            | 53[51-54]  | 97[96-97]\$ |                 |                  |
|         | Including<br>patient age, sex,<br>sPLSDA | 81[81-82]            | 78[76-79]  | 85[84-85]   |                 |                  |
|         | Including<br>patient age, sex,<br>glmnet | 74[73-75]            | 52[50-54]  | 95[95-96]   |                 |                  |
|         |                                          | Balanced<br>Accuracy | CS TP Rate | PA TP* Rate | PHT TP*<br>Rate | PPGL TP*<br>Rate |
| ALL-ALL | sPLSDA                                   | 53[52-53]            | 72[71-73]  | 53[52-54]   | 45[45-46]       | 42[41-43]        |
|         | glmnet                                   | 50[50-51]            | 39[38-40]  | 57[57-58]   | 59[58-60]       | 46[45-47]        |
|         | Including<br>patient age, sex,<br>sPLSDA | 54[54-55]            | 79[78-80]  | 51[50-52]   | 45[44-46]       | 43[42-44]        |



|  |                                                  |           |           |           |           |           |
|--|--------------------------------------------------|-----------|-----------|-----------|-----------|-----------|
|  | Including<br><br>patient age, sex,<br><br>glmnet | 50[49-50] | 41[39-42] | 56[55-57] | 58[57-58] | 45[44-46] |
|--|--------------------------------------------------|-----------|-----------|-----------|-----------|-----------|

\*TP stands for True Positive

\*\*Sensitivity is the TP rate of the disease group (EHT, PA, PPGL or CS)

\*\*\*Specificity is the TP rate of the control group (PHT).

All metrics are given as means, with the 95% confidence interval (in brackets). The marked population of CS-PHT glmnet specificity estimate (\$) was not normal (values close to 100).

**Table S6:** Summary of accuracies from analyses done via approach C (whole center exclusions).

| Scenario | Analysis                              | Balanced<br>Accuracy | Sensitivity** | Specificity*** |  |
|----------|---------------------------------------|----------------------|---------------|----------------|--|
| EHT-PHT  | Cluster 1,<br>sPLSDA                  | 58[57-59]            | 62[61-63]     | 53[51-55]      |  |
|          | Cluster 1,<br>glmnet                  | 50[50-50]            | 98[98-99]\$   | 0[0-0]\$       |  |
|          | Cluster 1 + age,<br>gender,<br>sPLSDA | 62[61-63]            | 64[63-64]     | 60[59-62]      |  |
|          | Cluster 1 + age,<br>gender, glmnet    | 50[50-50]            | 99[98-99]\$   | 0[0-0]\$       |  |

|          |                                 |                   |             |              |               |
|----------|---------------------------------|-------------------|-------------|--------------|---------------|
| PA-PHT   | Cluster 1, sPLSDA               | 69[68-70]         | 77[76-79]   | 61[60-62]    |               |
|          | Cluster 1, glmnet               | 68[68-69]         | 83[83-84]   | 53[52-55]    |               |
|          | Cluster 1 + age, gender, sPLSDA | 66[65-67]         | 68[66-69]   | 64[62-65]    |               |
|          | Cluster 1 + age, gender, glmnet | 65[64-66]         | 81[80-83]   | 48[46-50]    |               |
| PPGL-PHT | Cluster 1, sPLSDA               | 68[67-69]         | 69[68-70]   | 66[65-68]    |               |
|          | Cluster 1, glmnet               | 70[69-70]         | 83[82-84]   | 56[54-57]    |               |
|          | Cluster 1 + age, gender, sPLSDA | 71[70-72]         | 73[72-74]   | 70[68-71]    |               |
|          | Cluster 1 + age, gender, glmnet | 69[68-70]         | 82[82-83]   | 55[54-57]    |               |
|          |                                 | Balanced Accuracy | PA TP* Rate | PHT TP* Rate | PPGL TP* Rate |

|         |                                         |           |           |           |           |
|---------|-----------------------------------------|-----------|-----------|-----------|-----------|
| ALL-ALL | Cluster 1, sPLSDA                       | 57[57-58] | 69[67-70] | 35[33-36] | 69[68-70] |
|         | Cluster 1, glmnet                       | 58[57-59] | 68[67-70] | 30[29-32] | 75[74-76] |
|         | Cluster 1 + age, gender, sPLSDA         | 53[52-54] | 54[53-56] | 39[37-41] | 66[65-67] |
|         | Cluster 1 + age, gender, glmnet         | 56[56-57] | 67[65-68] | 27[25-29] | 76[75-77] |
| PA-PPGL | Cluster 1 PAVPPGL, sPLSDA               | 79[78-80] | 76[75-77] | -         | 81[80-83] |
|         | Cluster 1 PAVPPGL, glmnet               | 77[76-78] | 75[73-76] | -         | 80[78-81] |
|         | Cluster 1 PAVPPGL + age, gender, sPLSDA | 75[74-76] | 73[72-74] | -         | 77[76-78] |
|         | Cluster 1 PAVPPGL +                     | 76[75-77] | 73[72-74] | -         | 79[78-80] |

|  |                     |  |  |  |  |
|--|---------------------|--|--|--|--|
|  | age, gender, glmnet |  |  |  |  |
|--|---------------------|--|--|--|--|

\*TP stands for True Positive

\*\*Sensitivity is the TP rate of the disease group (EHT, PA, or PPGL)

\*\*\*Specificity is the TP rate of the control group (PHT).

All metrics are given as means, with the 95% confidence interval (in brackets). The marked populations of model estimates (\$) were not normal (values close to 100 or 0).

**Table S7:** Summary of accuracies from analyses done to evaluate datasets used in approach C (whole center exclusions).

| Metric     |                   | EHT-PHT   | PA-PHT    | PPGL-PHT  |
|------------|-------------------|-----------|-----------|-----------|
|            | Balanced Accuracy | 85[84-86] | 84[83-84] | 78[77-79] |
|            | GYDR TP Rate*     | 80[79-81] | 77[76-78] | 80[79-81] |
|            | ITTU3 TP Rate*    | 90[89-91] | 90[89-91] | 76[75-77] |
| + age, sex | Balanced Accuracy | 78[77-79] | 79[78-80] | 62[61-63] |
|            | GYDR TP Rate*     | 74[73-75] | 74[73-76] | 71[70-72] |
|            | ITTU3 TP Rate*    | 82[81-83] | 84[83-84] | 53[50-55] |

\*TP stands for True Positive

All metrics are given as means, with the 95% confidence interval (in brackets).

## References

Sumner, L.W., Amberg, A., Barrett, D., Beale, M.H., Beger, R., Daykin, C.A., Fan, T.W.M., Fiehn, O., Goodacre, R., Griffin, J.L.,

---

Hankemeier, T., Hardy, N., Harnly, J., Higashi, R., Kopka, J., Lane, A.N., Lindon, J.C., Marriott, P., Nicholls, A.W., Reily, M.D., Thaden, J.J., Viant, M.R., 2007. Proposed minimum reporting standards for chemical analysis: Chemical Analysis Working Group (CAWG) Metabolomics Standards Initiative (MSI). *Metabolomics* 3, 211–221.  
<https://doi.org/10.1007/s11306-007-0082-2>
